# Supplementary material for: Astrochronology of the Paleocene-Eocene Thermal Maximum on the Atlantic Coastal Plain
Source: PubMed Central journal article supplement (PMC9509358; doi:10.1038/s41467-022-33390-x), 2022-09-24
Supplement: 41467_2022_33390_MOESM1_ESM.pdf [file 41467_2022_33390_MOESM1_ESM.pdf]

Supplementary Information for

## **Astrochronology of the Paleocene-Eocene Thermal Maximum on the Atlantic Coastal Plain**

Mingsong Li\*, Timothy J. Bralower, Lee R. Kump, Jean M. Self-Trail, James C. Zachos, William D. Rush, Marci M. Robinson

\* Correspondence and requests for materials should be addressed to M.L. (email: [msli@pku.edu.cn](mailto:msli@pku.edu.cn))

The Supplementary Information includes:

Supplementary Figures 1-18

Supplementary Table 1

Supplementary Text 1 Changepoint analysis

Supplementary Text 2 Settings and outputs of the average spectral misfit analysis

Supplementary Text 3 Correlation coefficient (COCO) analysis

Supplementary References

## Supplementary Figures

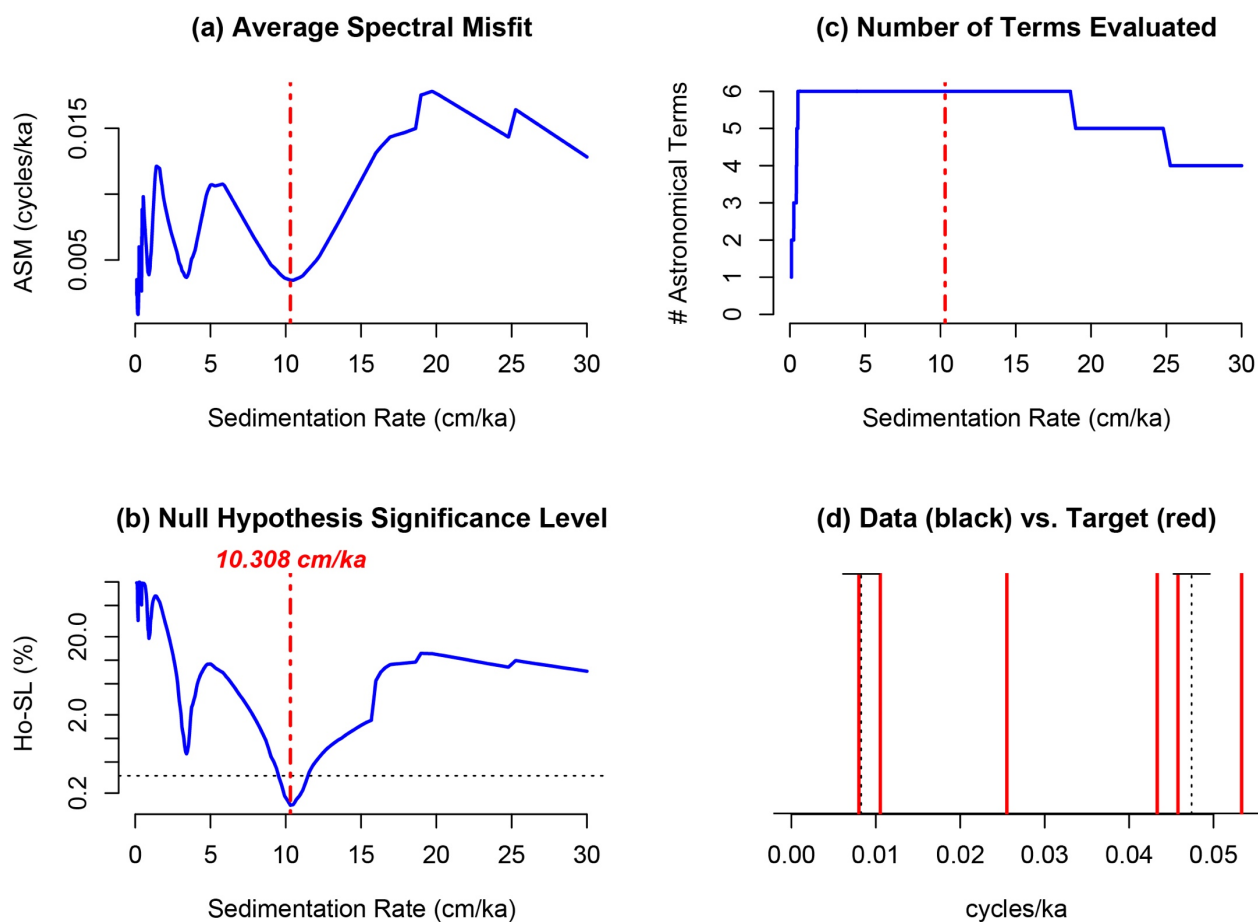

**Supplementary Figure 1** Average spectral misfit (ASM) of the detrended  $\log_{10}(\text{Ca})$  at Howards Tract cores. The series is interpolated to a 0.05 cm sampling rate after removing a linear trend. The parameters are detailed in Supplementary Text 1.

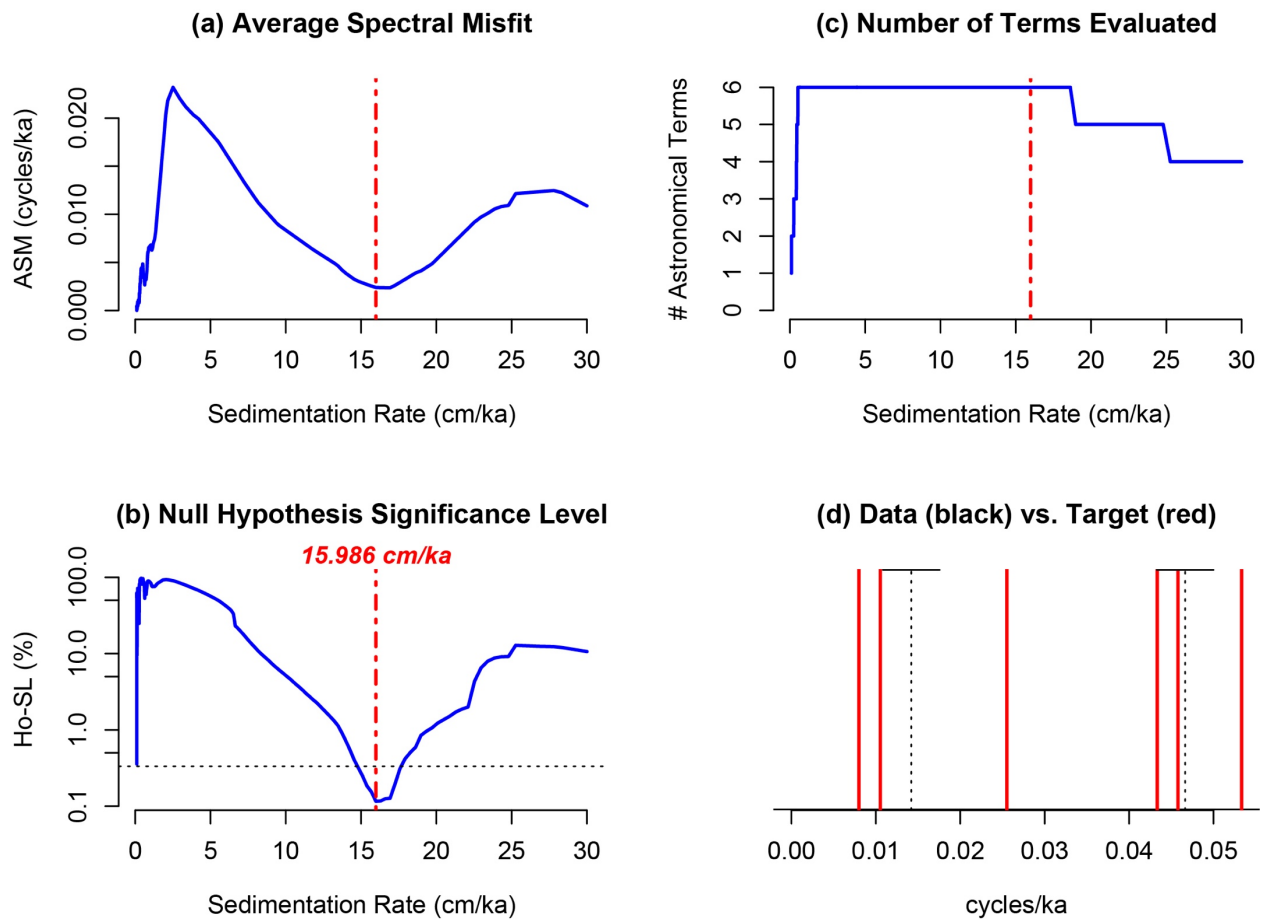

**Supplementary Figure 2** Average spectral misfit (ASM) of the magnetic susceptibility at Howards Tract cores. The series is interpolated to a 0.05 cm sampling rate after removing a 20 m loss trend. The parameters are detailed in Supplementary Text 1.

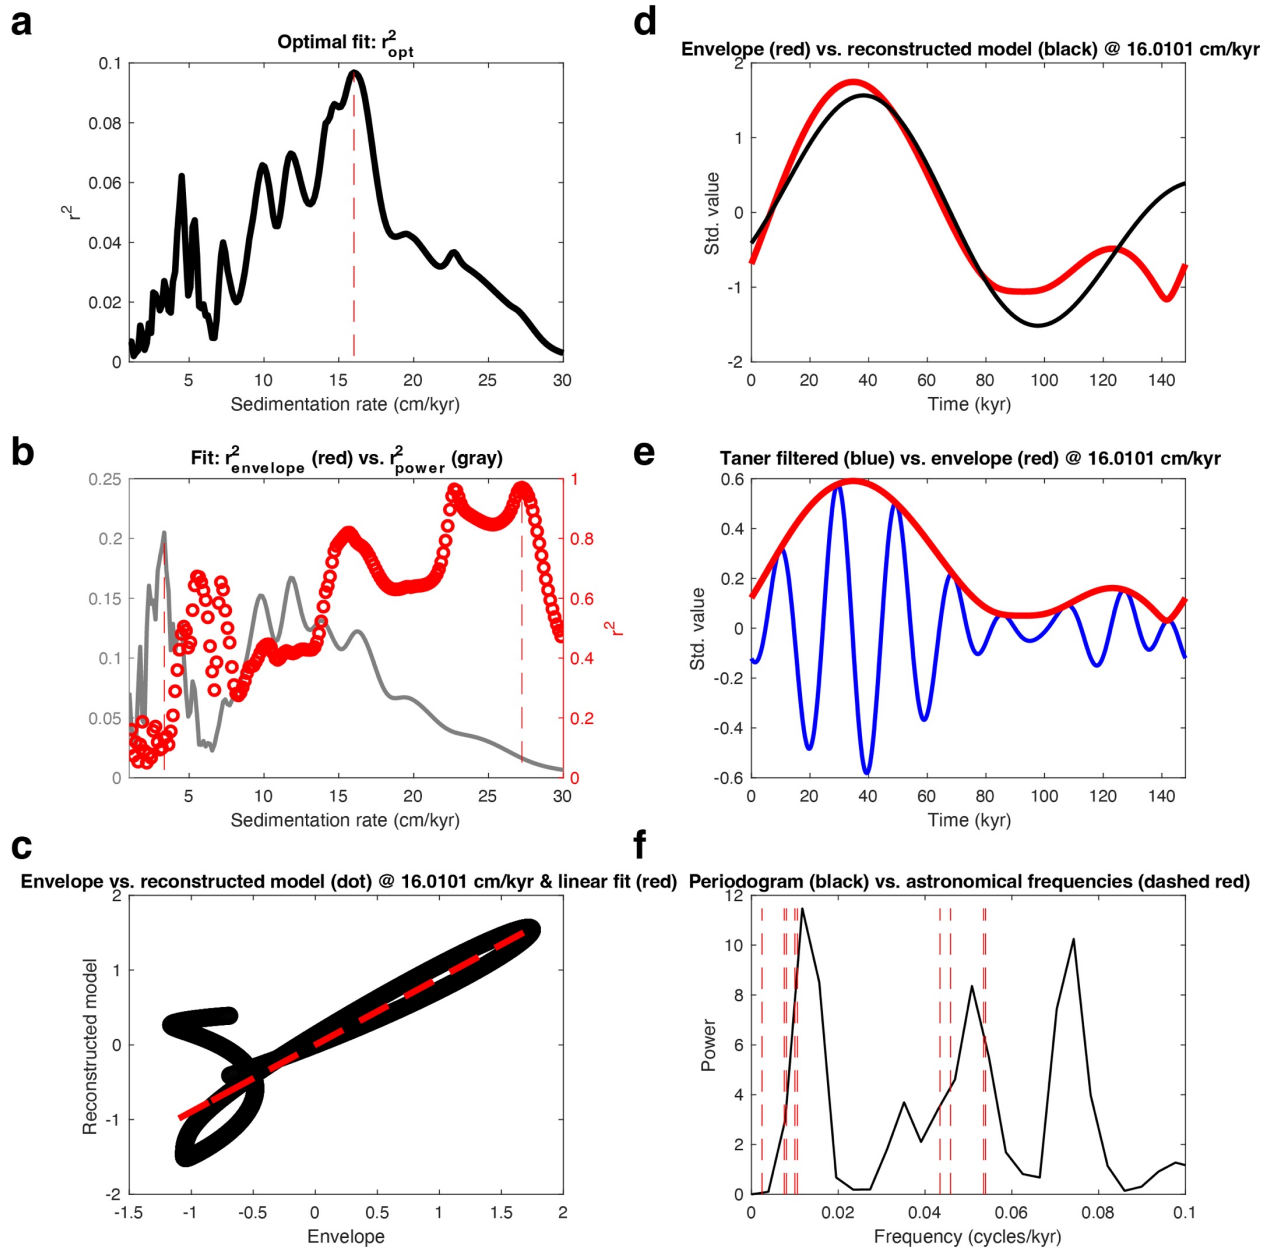

**Supplementary Figure 3** TimeOpt analysis of the linear-detrended  $\log_{10}(\text{Ca})$  series of the Aquia Formation and the Marlboro Clay. **a** Combined envelope and spectral power fit ( $r^2_{\text{opt}}$ ) indicates the optimal sedimentation rate is at 16.0 cm/kyr. **b** Squared correlation coefficient for the amplitude envelope fit ( $r^2_{\text{envelope}}$ ) and the spectral power fit ( $r^2_{\text{power}}$ ) at test sedimentation rates. **c** Linear fit of amplitude envelope in **e** and the reconstructed eccentricity model in **d**. **d** Comparison of the envelope of the amplitude modulation in **e** and the reconstructed eccentricity model. **e** Filtered precession cycles and their amplitude modulation of the tuned proxy series using a sedimentation rate of 16.0 cm/kyr. **f** Periodogram model of the tuned proxy series using a sedimentation rate of 16.0 cm/kyr shown with specified precession and eccentricity frequencies.



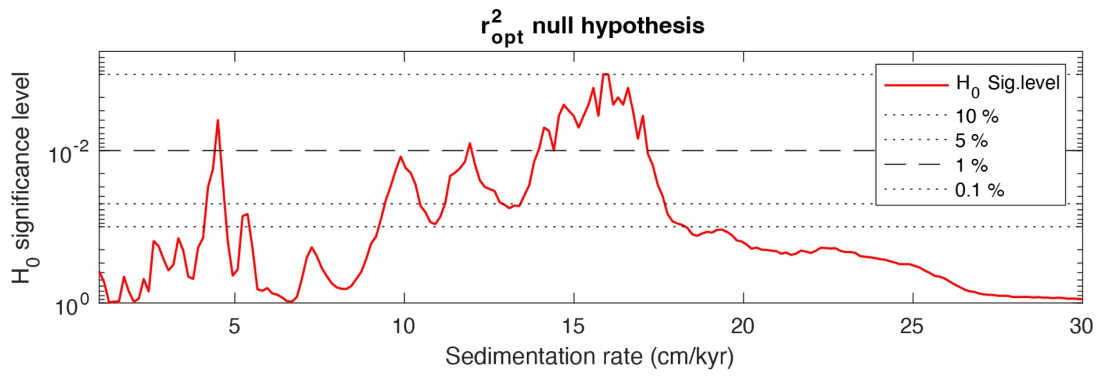

**Supplementary Figure 4** Null hypothesis significance levels of test sedimentation rates for Ca series of the Aquia Formation and the Marlboro Clay. Test sedimentation rates range from 1 cm/kyr to 30 cm/kyr. The total number of test sedimentation rates is 100. The target age for the astronomical frequencies is 55 Ma. Monte Carlo simulation is 2,000.

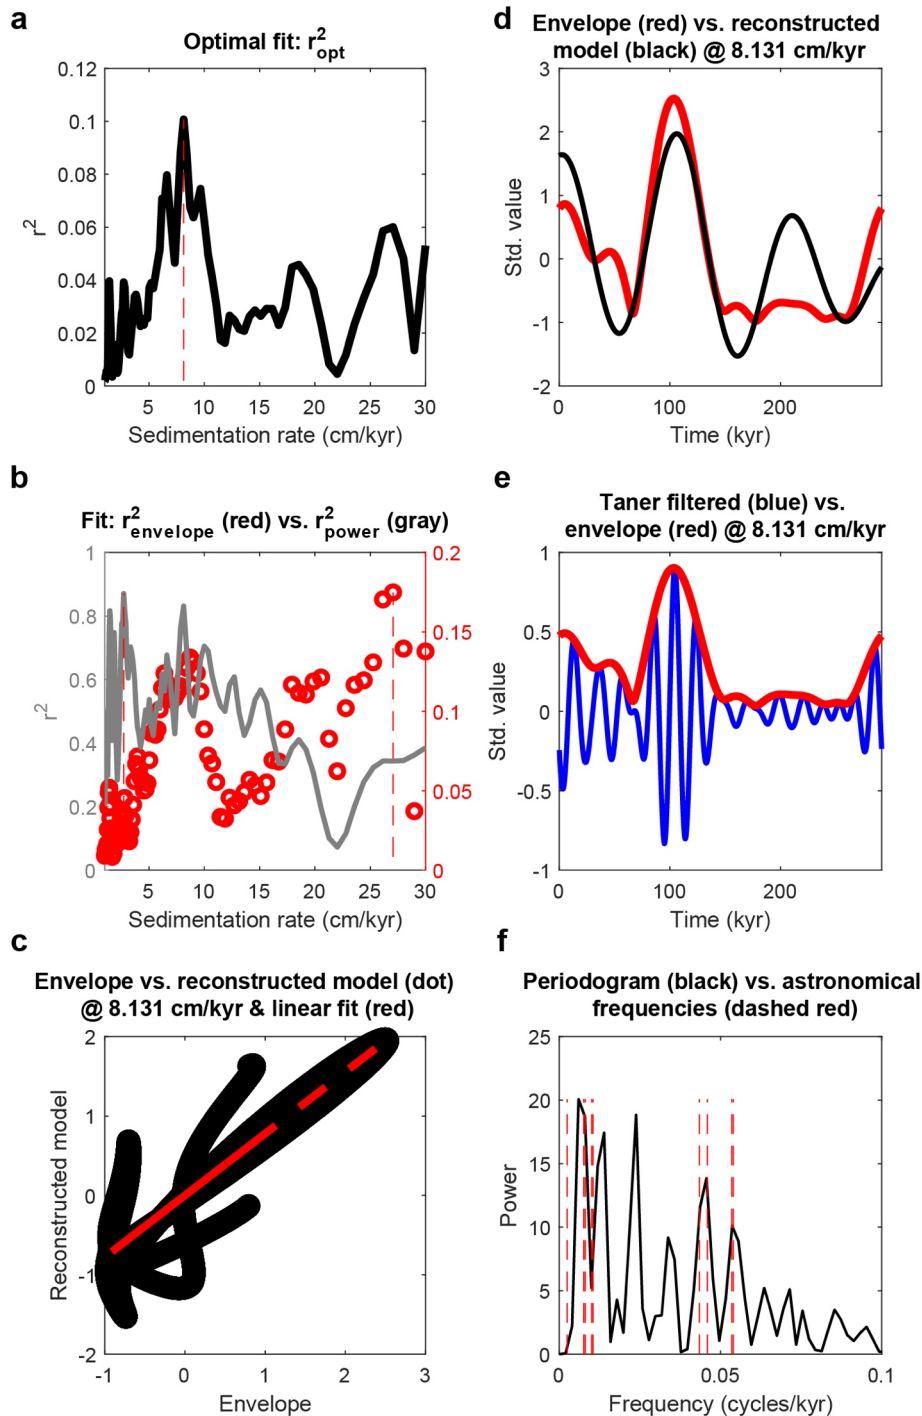

**Supplementary Figure 5** TimeOpt analysis of the magnetic susceptibility (MS) series of the Aquia Formation and the Marlboro Clay. **a** Combined envelope and spectral power fit ( $r^2_{\text{opt}}$ ) indicates the optimal sedimentation rate is at 8.13 cm/kyr. **b** Squared correlation coefficient for the amplitude envelope fit ( $r^2_{\text{envelope}}$ ) and the spectral power fit ( $r^2_{\text{power}}$ ) at test sedimentation rates. **c** Linear fit of amplitude envelope in **e** and the reconstructed eccentricity model in **d**. **d** Comparison of the envelope of the amplitude modulation in **e** and the reconstructed eccentricity model. **e** Filtered precession cycles and their amplitude modulation of the tuned proxy series using a sedimentation rate of 8.13 cm/kyr. **f** Periodogram model of the tuned proxy series using a sedimentation rate of 8.13 cm/kyr shown with specified precession and eccentricity frequencies.

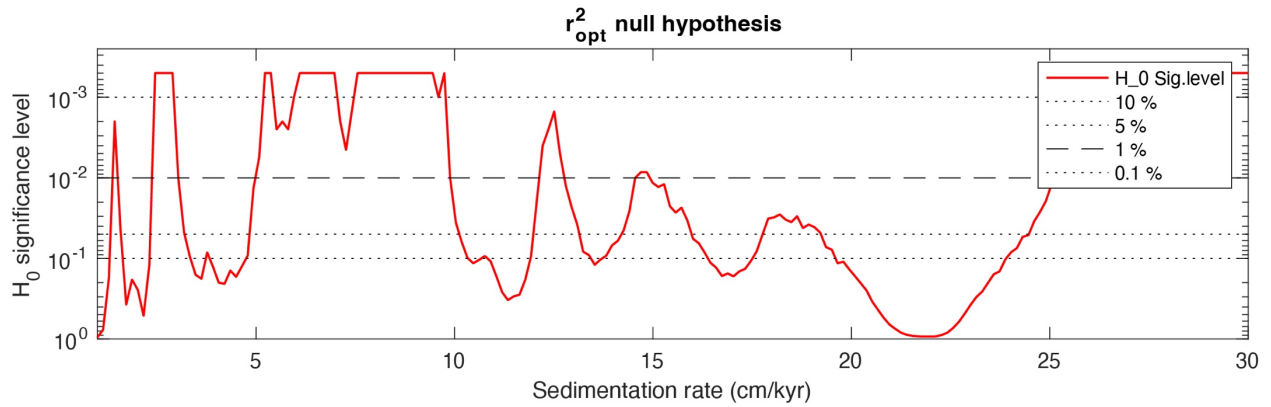

**Supplementary Figure 6** Null hypothesis significance levels of test sedimentation rates for magnetic susceptibility (MS) series of the Aquia Formation and the Marlboro Clay. Test sedimentation rates range from 1 cm/kyr to 30 cm/kyr. The total number of test sedimentation rates is 100. The target age for the astronomical frequencies is 55 Ma. Monte Carlo simulation is 2,000.

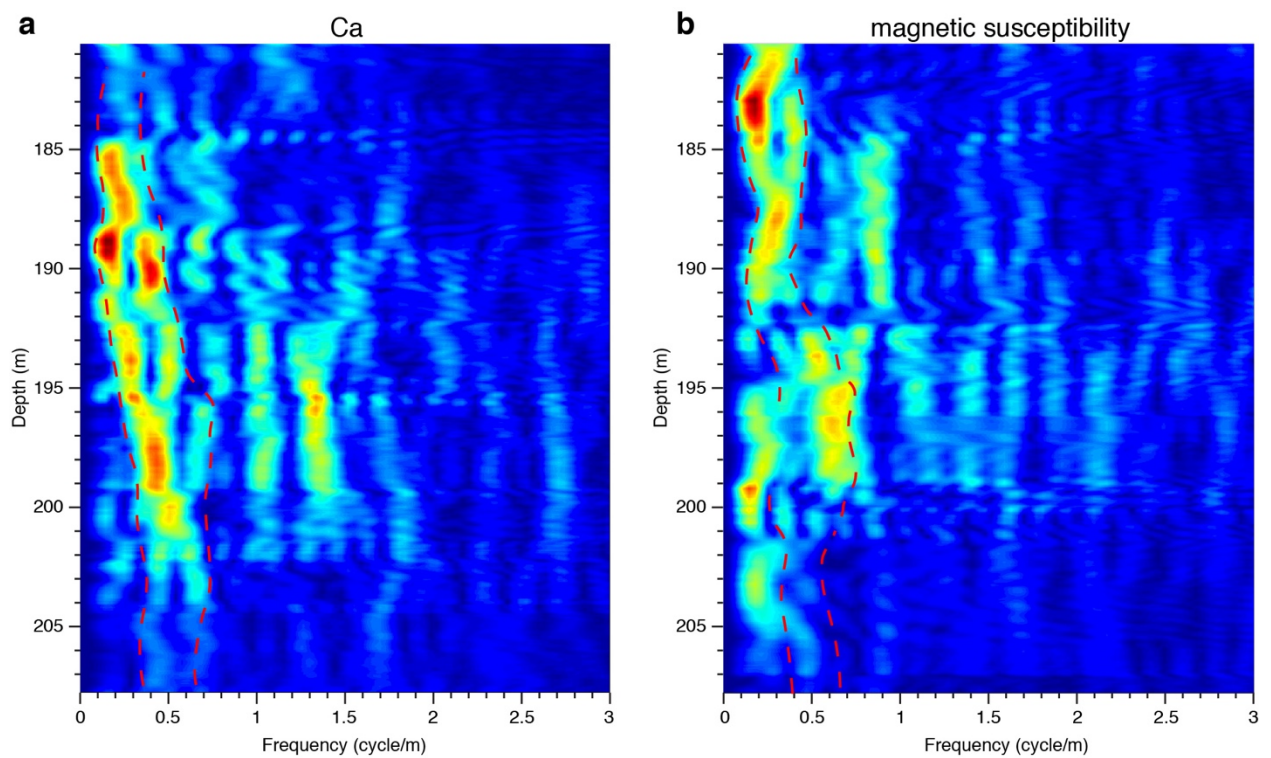

**Supplementary Figure 7** Evolutionary fast Fourier transform (FFT) of the detrended  $\log_{10}(\text{Ca})$  content (**a**) and detrended magnetic susceptibility (**b**) at Howards Tract. Dashed red lines bound signals of precession cycles. Both series are interpolated to a 0.005 cm sampling rate. Sliding window is 7 m with a step of 0.01 m.

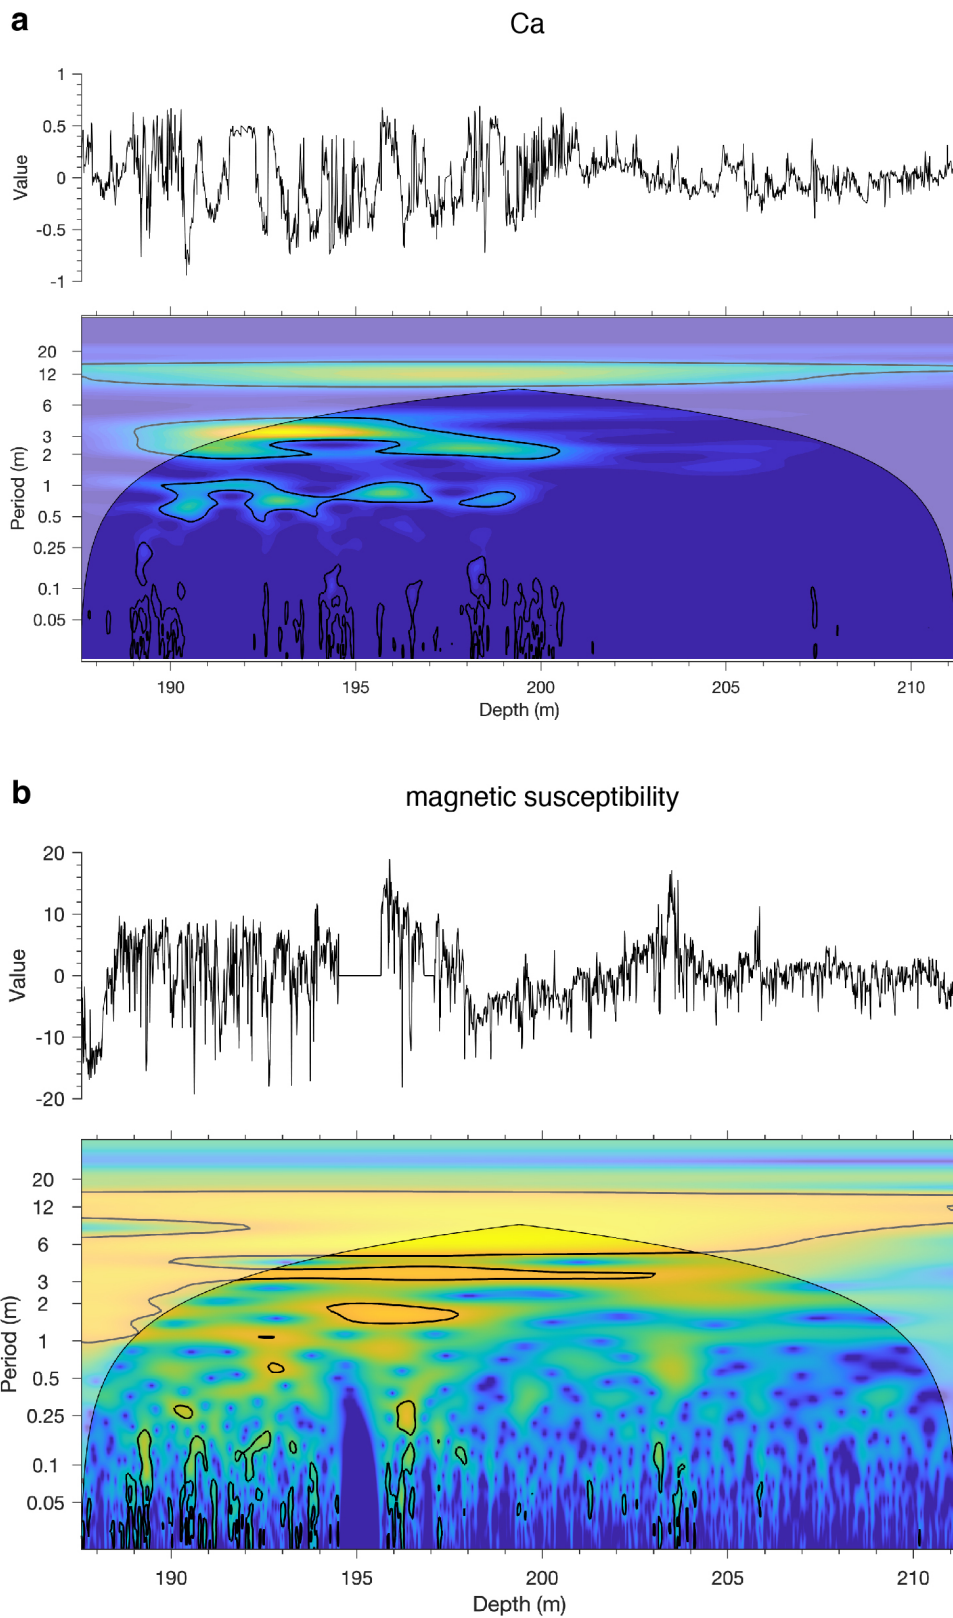

**Supplementary Figure 8** Wavelet transform of the detrended  $\log_{10}(\text{Ca})$  content (**a**) and detrended magnetic susceptibility (**b**) at Howards Tract using Acycle v2.4.1 and scripts provided in ref. <sup>1</sup>. Black lines denote significance level of 0.05 and shaded region denotes cone of influence.

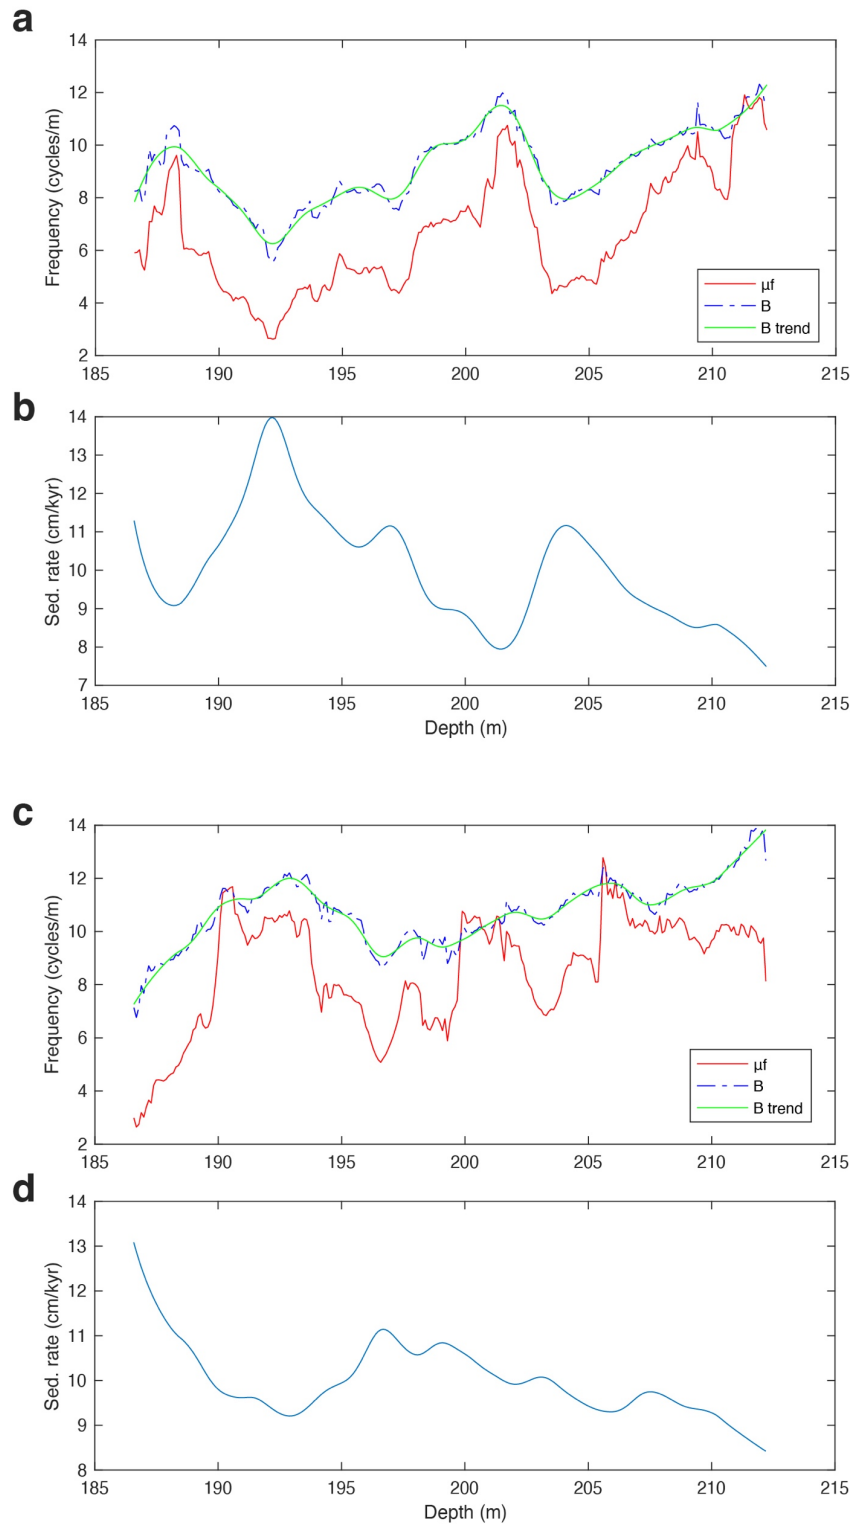

**Supplementary Figure 9** Spectral moments of  $\log_{10}(\text{Ca})$  (**a-b**) and magnetic susceptibility (**c-d**) series. **a** mean frequency ( $\mu f$ ) and bandwidth (B) of the  $\log_{10}(\text{Ca})$  series shown with the 4-m LOESS trend of the bandwidth (B trend). **b** Scaled sedimentation rate for the  $\log_{10}(\text{Ca})$  series. **c** mean frequency ( $\mu f$ ) and bandwidth (B) of the magnetic susceptibility series shown with the 4-m LOESS trend of the bandwidth (B trend). **d** Scaled sedimentation rate for the magnetic susceptibility series.

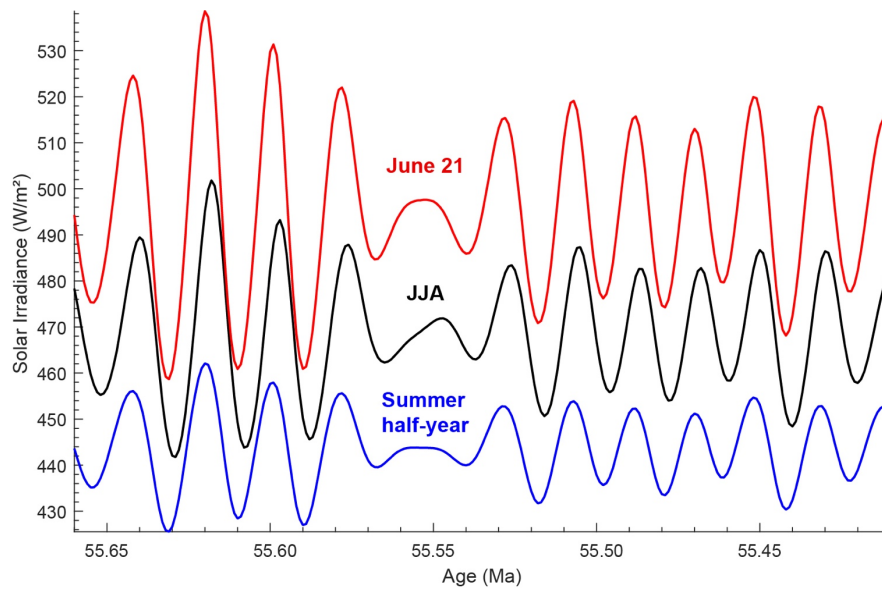

**Supplementary Figure 10** Mean solar irradiance at 35.685° N, which is the latitude of the grid including Howards Tract cores in cGENIE model on June 21 (red), in June-July-August (black), and in summer half-year (blue). All these curves are paced by ~20 kyr precession cycles modulated by eccentricity cycles. The irradiance data were calculated using the “Insolation” function in Acycle software.

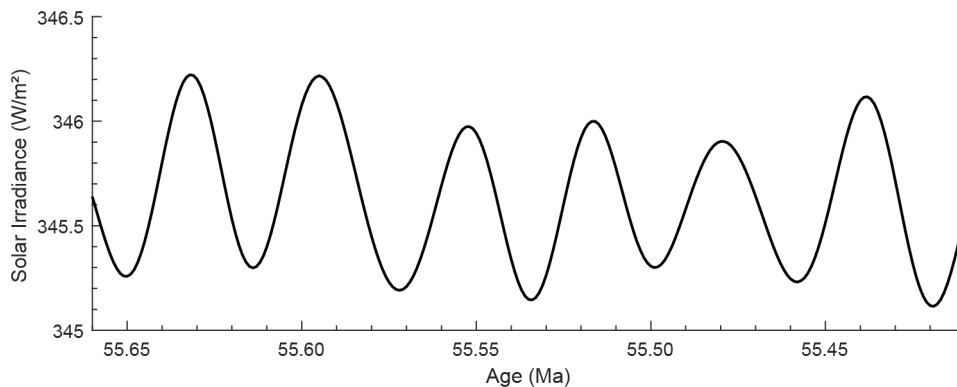

**Supplementary Figure 11** Annual solar irradiance at 35.685° N, which is the latitude of the grid including Howards Tract cores in cGENIE model. This curve is paced by 40 kyr obliquity cycles. The irradiance data were calculated using the “Insolation” function in Acycle software.



HT2

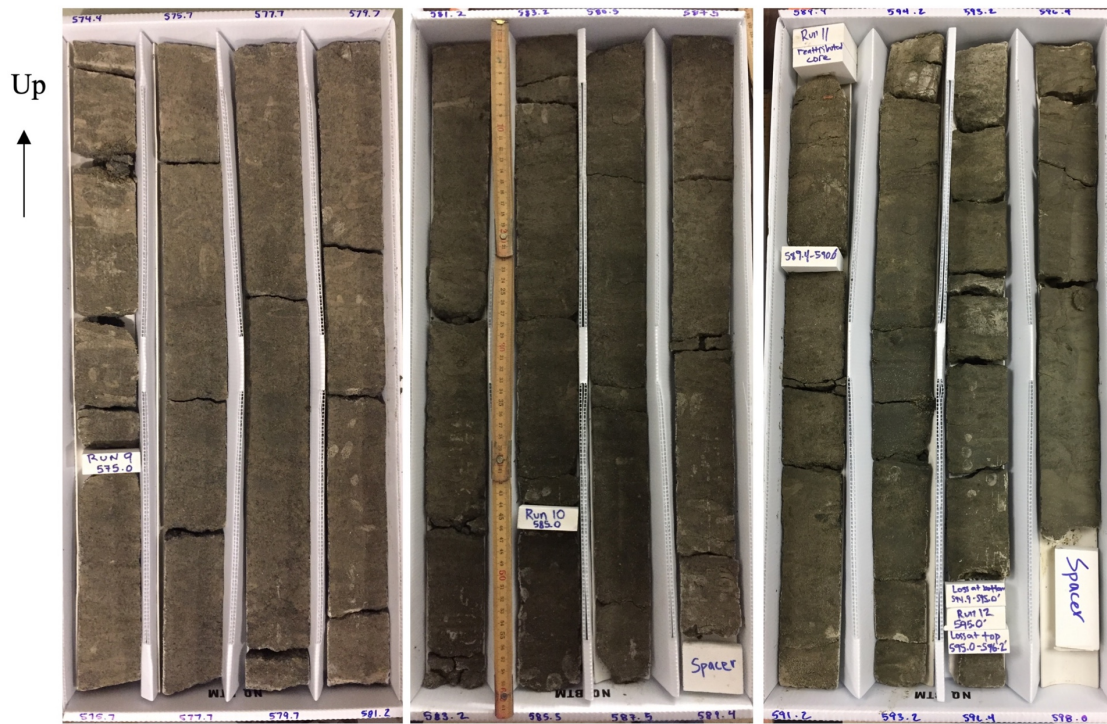

Box 11

Box 12

Box 13

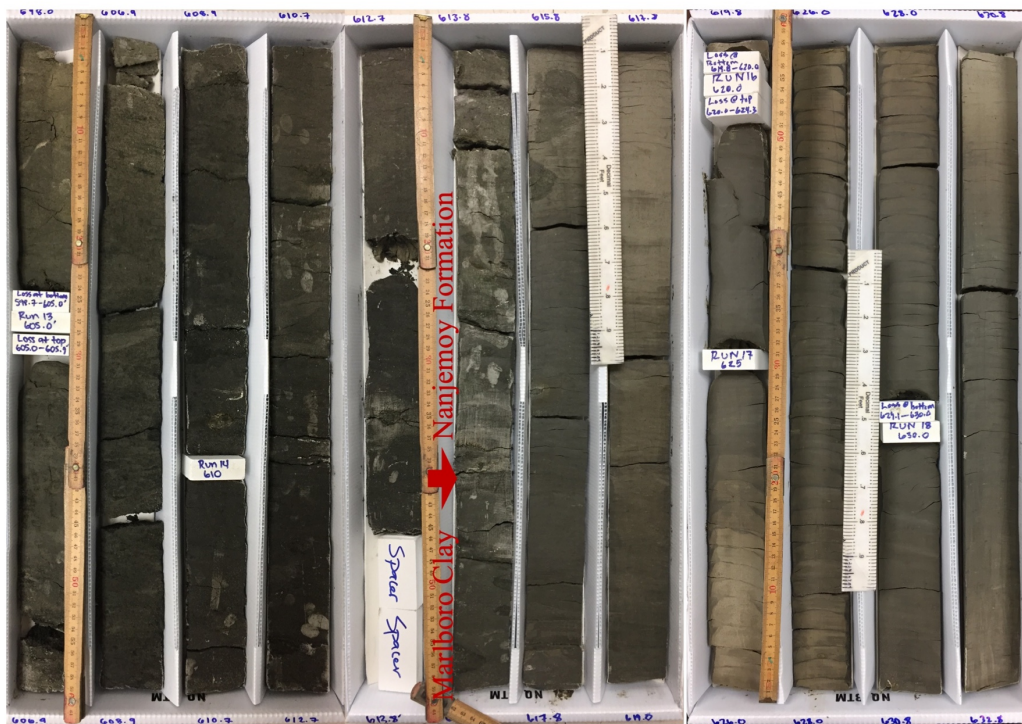

Box 14

Box 15

Box 16

**Supplementary Figure 12** Core photos. Howards Tract 2 (HT2) core from 175.08 m (574.4 ft) to 192.88 m (632.8 ft).

HT2

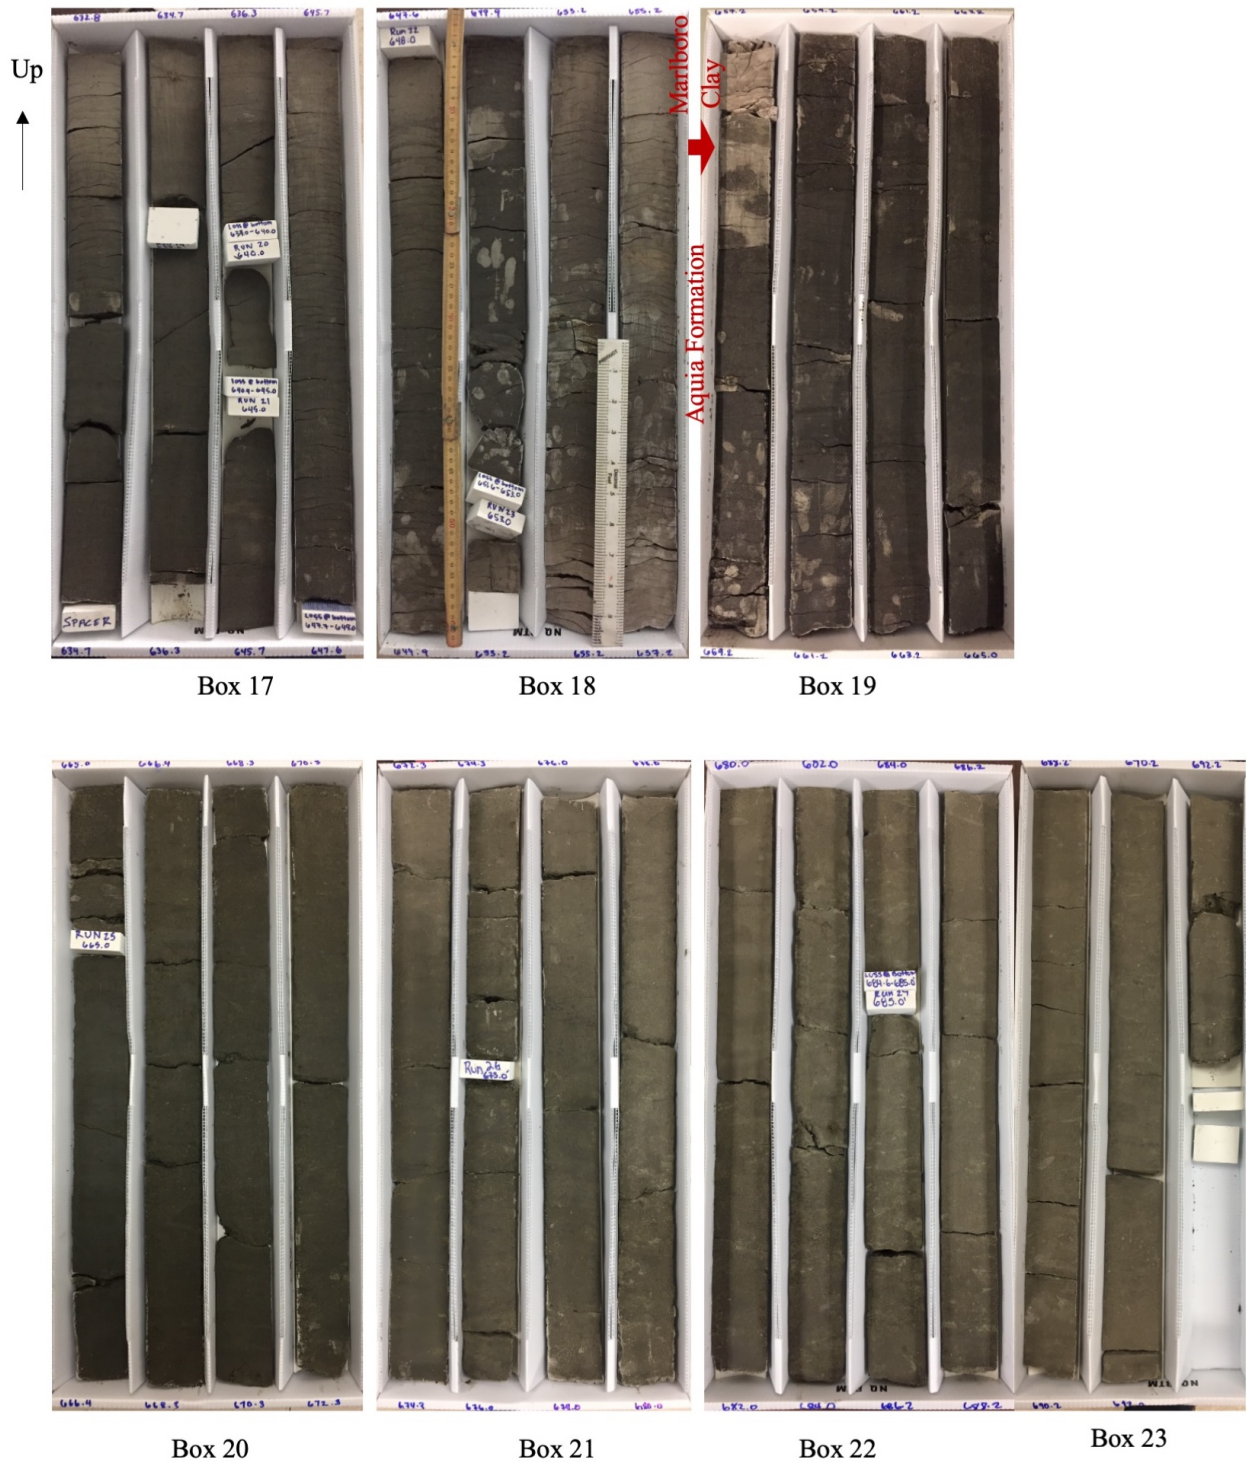

**Supplementary Figure 13** Core photos. Howards Tract 2 (HT2) core from 192.88 m (632.8 ft) to 211.24 m (693.0 ft). The light gray dots and areas in boxes 18 and 19 don't reflect original color but the color after the muddy water has dried.



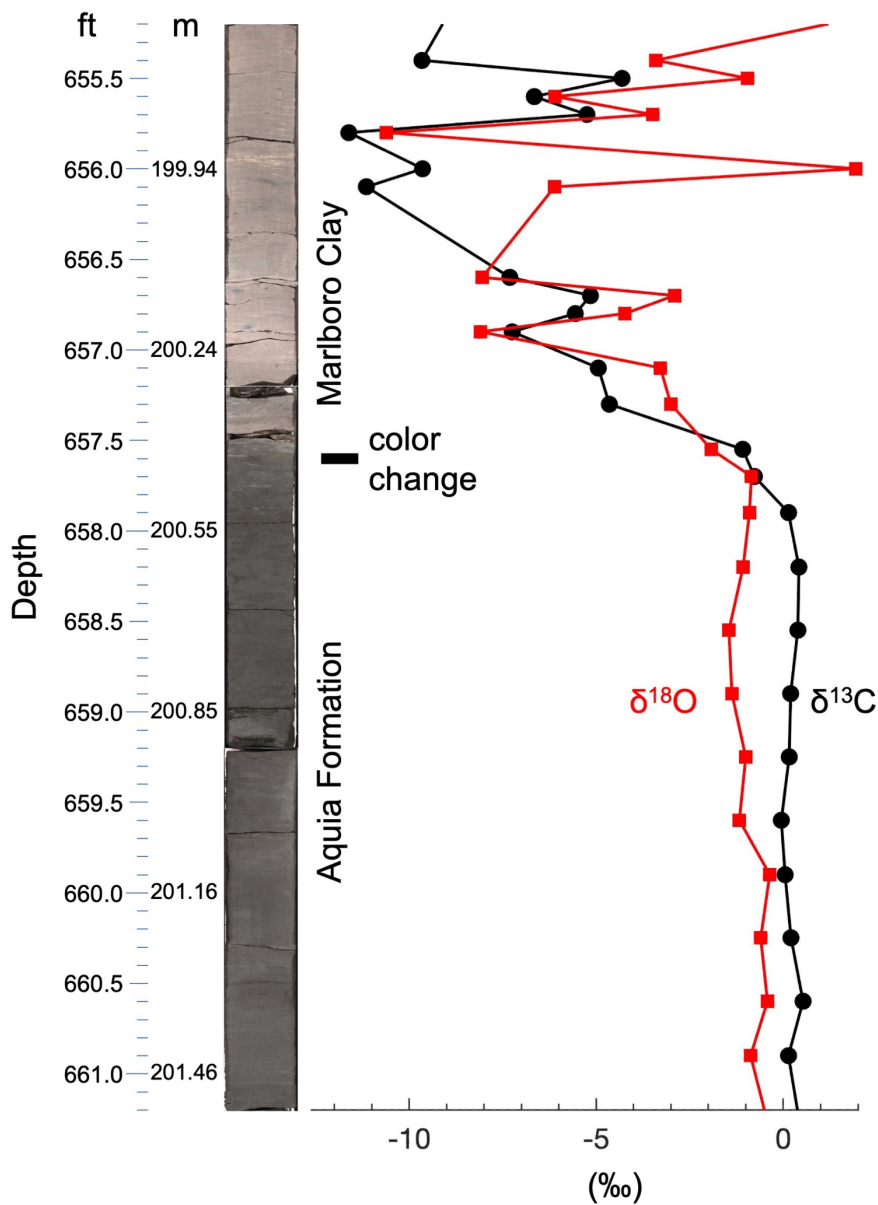

**Supplementary Figure 14** High-resolution core photos near the Aquia/Marlboro contact shown with  $\delta^{13}\text{C}$  (black dot) and  $\delta^{18}\text{O}$  (red square) data. The sediments change from a silty clay above (Dark greenish gray 5g4/1; Marlboro Clay) to a glauconitic sandy clay below (Greenish black 5gy 2/1; Aquia Formation) with no obvious break. Additionally, there isn't a big changeover in the nannoflora that would suggest missing time.

HT1

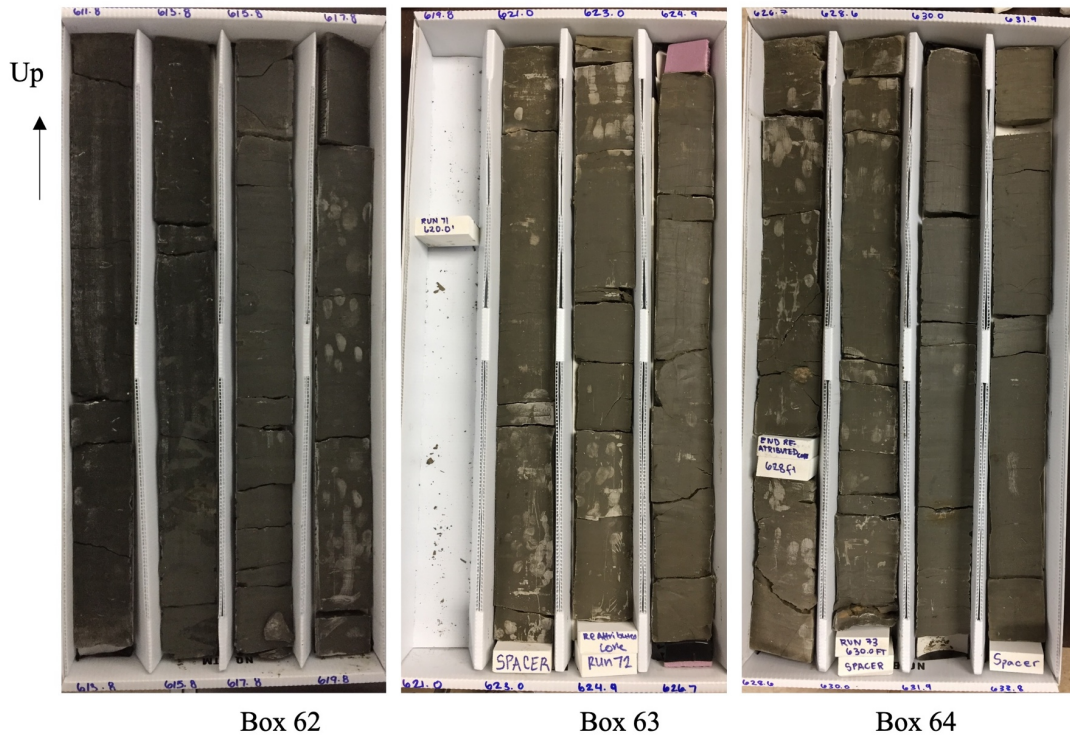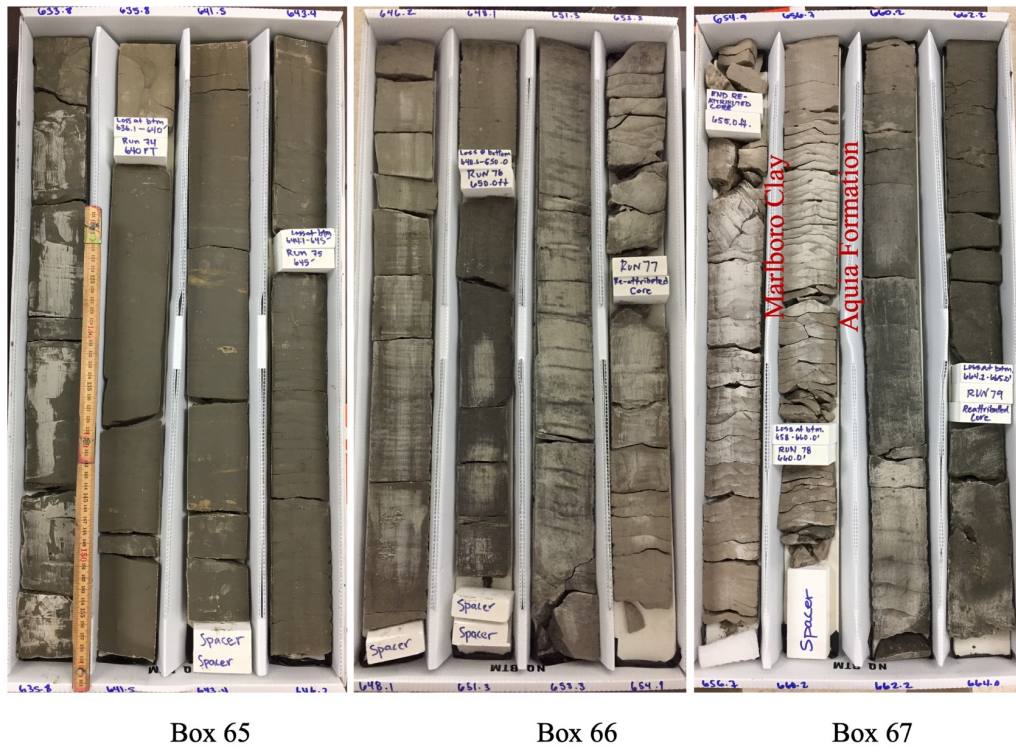

**Supplementary Figure 15** Core photos. Howards Tract 1 (HT1) core from 186.48 m (611.8 ft) to 202.39 m (664.0 ft).

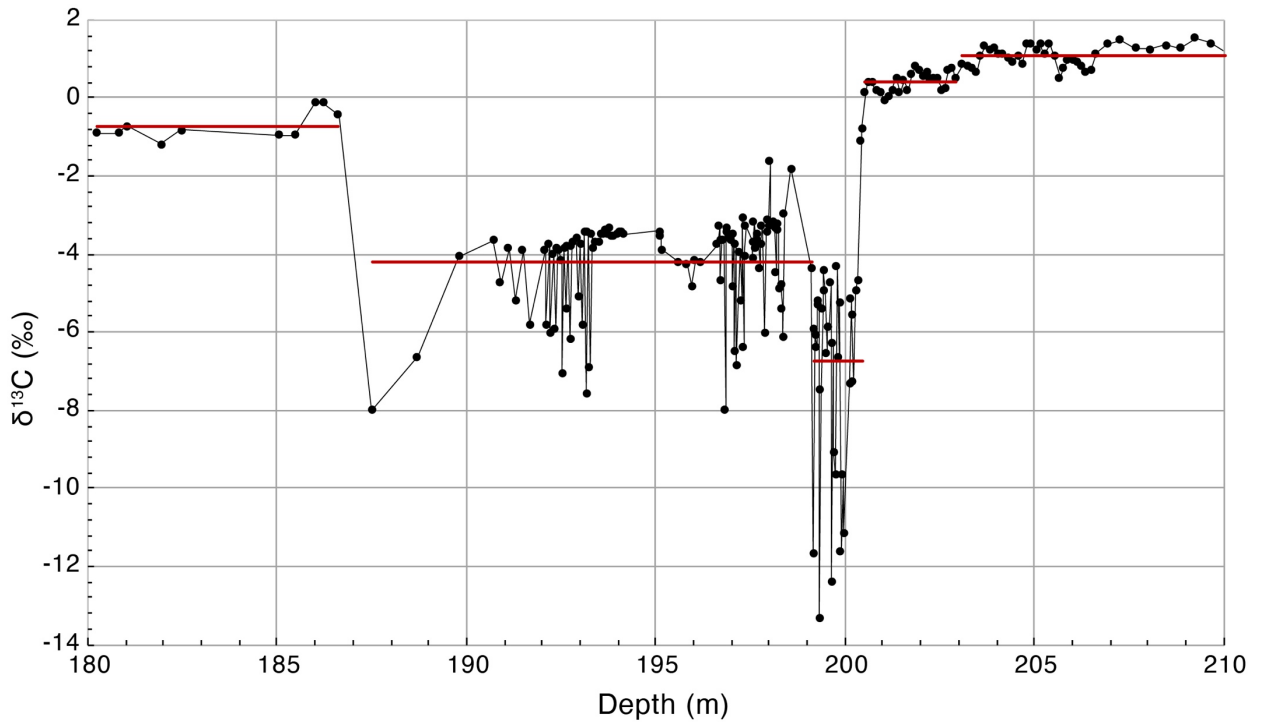

**Supplementary Figure 16** Change point analysis of the  $\delta^{13}\text{C}$  data. See Supplementary Text 1 for details.

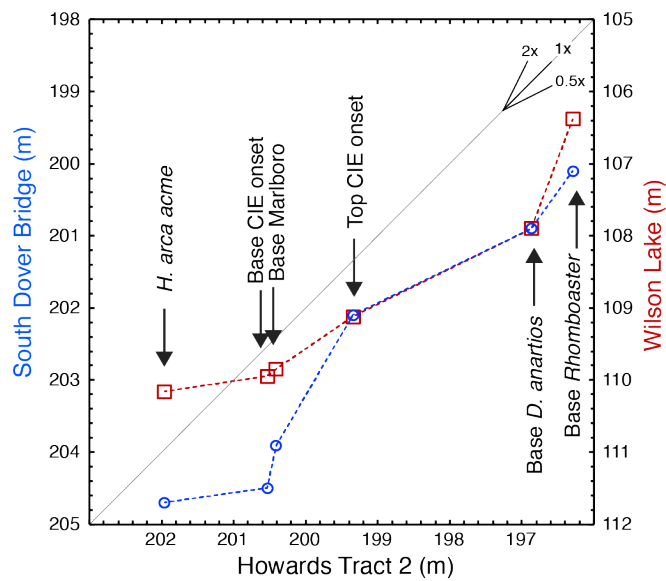

**Supplementary Figure 17** Comparison of the carbon isotope excursion (CIE) onset with the base of the Marlboro Clay as well as three nannoplankton datums. Among these, the top of the CIE onset uses a less likely option (199.34 m). Blue: Howards Tract 2 versus South Dover Bridge (left); Red: Howards Tract 2 versus Wilson Lake (right).

The analysis of the timing of the CIE onset relative to biostratigraphic datums and the base of the Marlboro Clay at Howards Tract 2 (HT2), South Dover Bridge (SDB), Maryland and Wilson Lake (WL), New Jersey is shown in Figure 5 and Supplementary Figure 17. The biostratigraphic datums are from ref. <sup>2</sup> for SDB, ref. <sup>3</sup> and ref. <sup>4</sup> for WL and Self-Trail (unpublished data) for HT2. The base of the Marlboro Clay is based on ref. <sup>5</sup>. The analysis used here is based on ref. <sup>6</sup>.

### Howard Tract Corehole (2) (HT2)

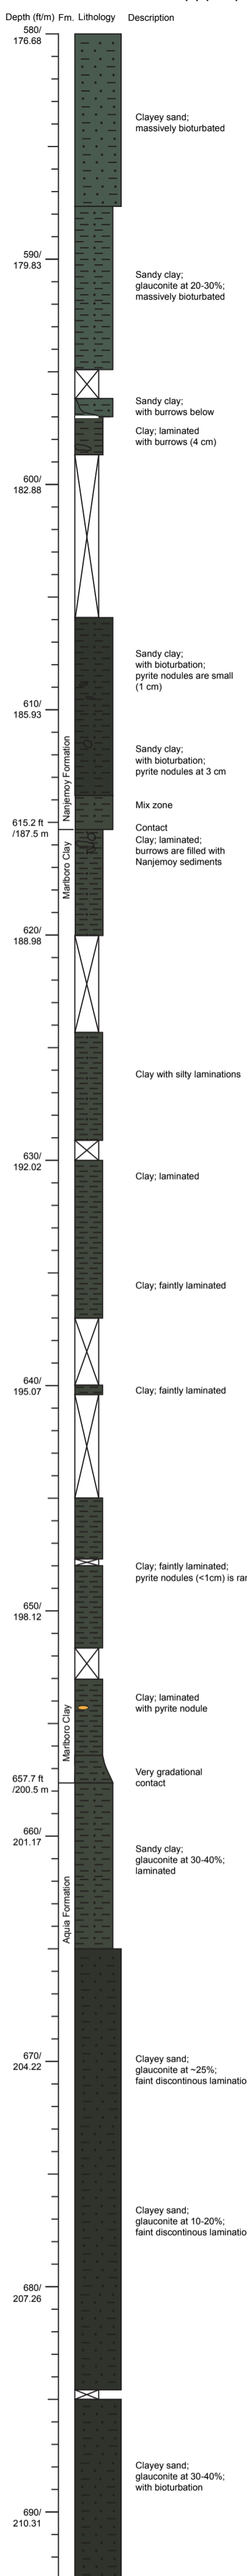

### Howard Tract Corehole (1) (HT1)

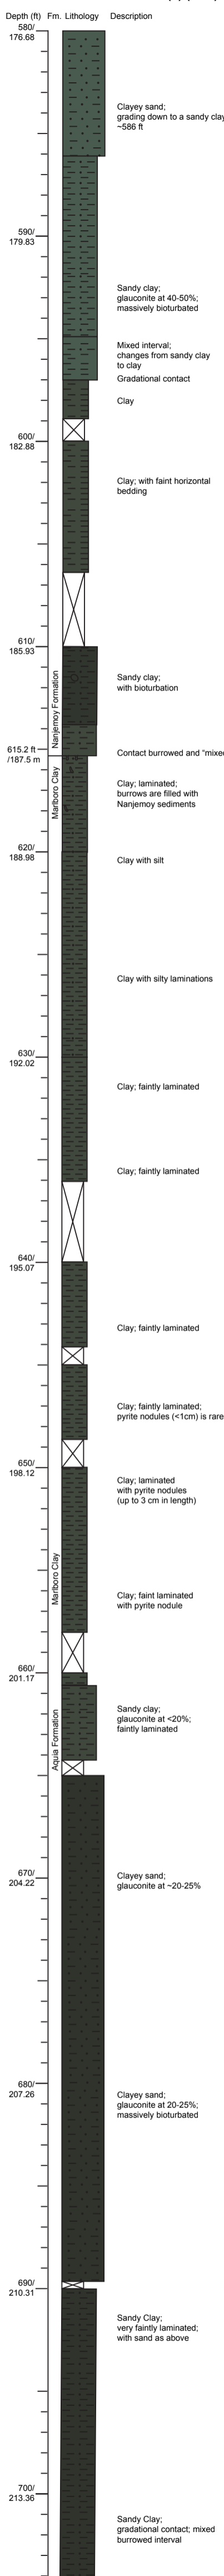

### HT composite

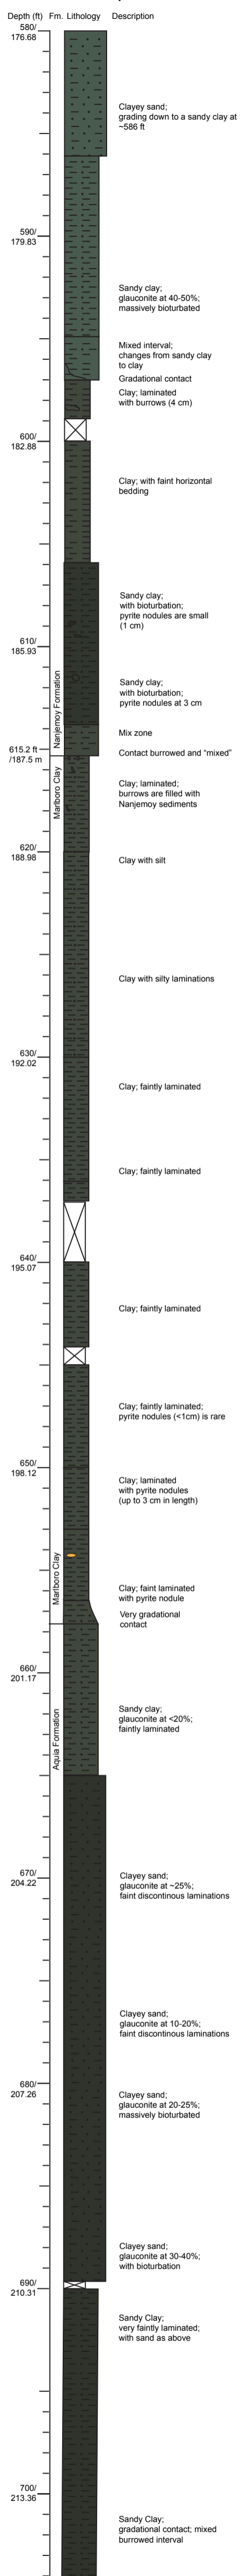

Supplementary Figure 18 Lithology of Howards Tract cores.

**Supplementary Table 1** Age model for the Howards Tract cores. ATS: astronomical time scale.

| <b>Depth (m)</b> | <b>Time (kyr, floating ATS)</b> | <b>Label (precession no.)</b> | <b>Sedimentation rate (cm/kyr)</b> |
|------------------|---------------------------------|-------------------------------|------------------------------------|
| 186.707          | 170.156                         | P6                            | 15.6                               |
| 189.572          | 151.84                          | P5                            | 11.1                               |
| 192.037          | 129.668                         | P4                            | 7.8                                |
| 195.872          | 80.263                          | P2                            | 12.1                               |
| 198.417          | 59.296                          | P1                            | 11.1                               |
| 200.662          | 39.052                          | P0                            | 8.3                                |
| 202.592          | 15.675                          | P-1                           | 11.6                               |
| 205.102          | -6                              | P-2                           | 9.5                                |
| 207.392          | -30                             | P-3                           | 15.9                               |
| 210.727          | -51                             | P-4                           |                                    |

## Supplementary Text 1 Changepoint analysis

Four changepoints are detected at locations of 186.61, 199.12, 200.47, and 202.92 m (Supplementary Fig. 16) using the settings and codes below.

```
> filename = "/to/HT-d13C.txt"
> x = read.delim(filename, header = FALSE, sep = ",", dec =
".")[,2]
> ans =
cpt.meanvar(x,penalty="Manual",pen.value="10*log(n)",method="P
ELT")
> plot(ans,cpt.width=2)
> print(ans)
Class 'cpt' : Changepoint Object
  ~~      : S4 class containing 12 slots with names
           cpttype date version data.set method test.stat
pen.type pen.value minseglen cpts ncpts.max param.est

Created on   : Wed Jul 15 03:20:23 2020

summary(.)  :
-----
Created Using changepoint version 2.2.2
Changepoint type      : Change in mean and variance
Method of analysis    : PELT
Test Statistic       : Normal
Type of penalty       : Manual with value, 53.93628
Minimum Segment Length : 2
Maximum no. of cpts   : Inf
Changepoint Locations : 10 116 149 174

# Changepoint Locations (m): 186.61 199.12 200.47 202.92
```

## Supplementary Text 2 Settings and outputs of the average spectral misfit analysis

Average spectral misfit (ASM) results are shown in **Fig. 4** in the main text and **Supplementary Figures 1 and 2**. Detailed settings for the ASM analysis are listed below.

### Calcium content

```
> data<-read() # select HT-Ca-su-187.54+-log10-Linear.txt
> dat = linterp(data,dt = .05)
>
freq=lowspec(dat,detrend=T,padfac=10,siglevel=0.9,output=2,xma
x=10)

* Number of significant F-test peaks identified = 6
ID / Frequency / Period / Harmonic_CL / LOWSPEC_CL
1 0.08016878 12.47368 99.8097 58.81714
2 0.4599156 2.174312 99.45369 64.70208
3 1.362869 0.7337461 92.89494 99.14315
4 1.49789 0.6676056 97.05687 96.20943
```



```

5  5.042194  0.1983264  97.82874  91.03616
6  5.413502  0.1847233  90.23107  94.15875
----- PERFORMING Robust Locally-Weighted Regression Spectral
Background Estimation -----
* Number of data points in stratigraphic series: 475
* Stratigraphic series length (space or time): 23.7
* Sampling interval (space or time): 0.05

* Raw AR1 = 0.6855143
* Prewhitening with AR1 coefficient of 0.6855143
* Prewhitened AR1 = -0.09220875

* Linear trend removed. m= -8.854628e-05 b= 0.01900229

* Nyquist frequency: 10
* Rayleigh frequency: 0.04219409
* MTM Power spectrum bandwidth resolution (halfwidth):
0.1265823
* Padded to 4740 points
* LOWSPEC tuning parameter = 5.360768

* Searching for significant spectral peaks that satisfy 90 %
CL
    requirements outlined in Meyers (2012):
* Number of significant F-test peaks identified = 6
ID / Frequency / Period / Harmonic_CL / LOWSPEC_CL
1  0.08016878  12.47368  99.8097  58.81714
2  0.4599156  2.174312  99.45369  64.70208
3  1.362869  0.7337461  92.89494  99.14315
4  1.49789  0.6676056  97.05687  96.20943
5  5.042194  0.1983264  97.82874  91.03616
6  5.413502  0.1847233  90.23107  94.15875

>
> target= c(1/125, 1/95, 1/39.17,1/23.08,1/21.84, 1/18.75)
> asm(freq=freqs, target=target, rayleigh= 0.04219409,
nyquist= 10,sedmin = 0.1,sedmax = 30, numsed = 300, iter=100000)
----- PERFORMING AVERAGE SPECTRAL MISFIT ANALYSIS -----

**** WARNING: No uncertainty assigned to astronomical target
frequencies.

* Analysis complete:
  Optimal Sedimentation Rate (cm/ka) at = 10.3081
  Ho-SL (%) = 0.14
  or p-value = 0.0014
  ASM (cycles/ka) = 0.003472542
  Number of Astronomical Terms Fit = 6

```

## Magnetic susceptibility



```

> data<-read() # read HT-MS-comp-187.54-211.24-20-LOESS.txt
> dat = linterp(data,dt = .05)

----- APPLYING PIECEWISE-LINEAR INTERPOLATION TO STRATIGRAPHIC
SERIES -----

* Number of samples= 4364
* New number of samples= 474
>
freq=lowspec(dat,detrend=T,padfac=10,siglevel=0.9,output=2,xma
x=10)

----- PERFORMING Robust Locally-Weighted Regression Spectral
Background Estimation -----
* Number of data points in stratigraphic series: 474
* Stratigraphic series length (space or time): 23.65
* Sampling interval (space or time): 0.05

* Raw AR1 = 0.5107695
* Prewhitening with AR1 coefficient of 0.5107695
* Prewhitened AR1 = -0.1560995

* Linear trend removed. m= 0.02044113 b= -4.145343

* Nyquist frequency: 10
* Rayleigh frequency: 0.0422833
* MTM Power spectrum bandwidth resolution (halfwidth):
0.1268499
* Padded to 4730 points
* LOWSPEC tuning parameter = 5.355136

* Searching for significant spectral peaks that satisfy 90 %
CL
    requirements outlined in Meyers (2012):
* Number of significant F-test peaks identified = 10
ID / Frequency / Period / Harmonic_CL / LOWSPEC_CL
1  0.08879493  11.2619  93.48088  99.96105
2  0.2917548  3.427536  99.92273  63.46254
3  3.94926  0.253212  94.45833  81.81575
4  4.097252  0.244066  91.24796  65.77968
5  6.118393  0.1634416  94.7472  94.0295
6  6.824524  0.1465304  90.99411  86.75781
7  7.391121  0.1352975  98.83166  94.73402
8  8.372093  0.1194444  90.98938  98.2276
9  9.72093  0.1028708  90.63362  92.49079
10 9.915433  0.1008529  99.26139  94.63583
> freqs = c(0.08879493, 0.2917548, 3.94926, 4.097252, 6.118393,
6.824524, 7.391121, 8.372093, 9.72093, 9.915433)
> target= c(1/125, 1/95, 1/39.17,1/23.08,1/21.84, 1/18.75)
> asm(freq=freqs, target=target, rayleigh= 0.0422833, nyquist=
10,sedmin = 0.1,sedmax = 30, numsed = 300, iter=100000)

```

----- PERFORMING AVERAGE SPECTRAL MISFIT ANALYSIS -----

\*\*\* WARNING: No uncertainty assigned to astronomical target frequencies.

\* Analysis complete:  
Optimal Sedimentation Rate (cm/ka) at = 15.98551  
Ho-SL (%) = 0.116  
or p-value = 0.00116  
ASM (cycles/ka) = 0.002395696  
Number of Astronomical Terms Fit = 6

### Supplementary Text 3 Correlation coefficient (COCO) analysis

Correlation coefficients (COCO) between the power spectrum of the detrended stratigraphic series and the target astronomical solutions are calculated for the test sedimentation rate. The log file for the COCO analyses of Ca and magnetic susceptibility series records the parameters used in the analyses. Results of the COCO analyses are shown in **Fig. 4** in the main paper.

#### Calcium content

- - - - - Summary - - - - -  
24-Dec-2021 10:41:02  
HT-Ca-su-187.54+-log10-Linear-rsp0.01-linear-2000sim-1slice-COCO-log.txt  
Data: 187.5405 to 211.2405m.  
Sampling rate: 0.01.  
Number of data points: 2371  
Data: Number of slices is 1.  
Number of simulations is 2000  
Data: Remove red noise model: classic AR1 removed (F - Fred).  
Correlation method: Pearson  
Zero padding for the data is 5000  
Tested sedimentation rate step is 0.1 cm/kyr from 0.13 to 30 cm/kyr  
Target age is 56000 ka.  
Zero padding is 5000.  
Freq. is 0-0.06 cycles/kyr.  
Astronomical solution: User-defined  
Astronomical cycles are: 125 95 39.8 23.3 22 18.7  
- - - - - End - - - - -

#### Magnetic susceptibility

- - - - - Summary - - - - -  
24-Dec-2021 11:09:31  
HT-MS-comp-187.54-211.24-20-LOESS-rsp0.01-linear-2000sim-1slice-COCO-log.txt  
Data: 187.542 to 211.232m.  
Sampling rate: 0.01.  
Number of data points: 2370

Data: Number of slices is 1.  
 Number of simulations is 2000.  
 Data: Remove red noise model: classic AR1 removed (F - Fred).  
 Correlation method: Pearson.  
 Zero padding for the data is 5000.  
 Tested sedimentation rate step is 0.1 cm/kyr from 0.13 to 30  
 cm/kyr.  
 Target age is 56000 ka.  
 Zero padding is 5000.  
 Freq. is 0-0.06 cycles/kyr.  
 Astronomical solution: User-defined  
 Astronomical cycles are: 125 95 39.8 23.3 22 18.7  
 - - - - - End - - - - -

### Supplementary References

1. Torrence C. & Compo G. P. A practical guide to wavelet analysis. *Bull. Amer. Meteor. Soc.* **79**, 61-78 (1998).
2. Self-Trail J. M., Powars D. S., Watkins D. K. & Wandless G. A. Calcareous nannofossil assemblage changes across the Paleocene–Eocene Thermal Maximum: Evidence from a shelf setting. *Mar. Micropaleontol.* **92**, 61-80 (2012).
3. Bralower T. J. & Self-Trail J. M. Nannoplankton malformation during the Paleocene–Eocene Thermal Maximum and its paleoecological and paleoceanographic significance. *Paleoceanography* **31**, 1423-1439 (2016).
4. Gibbs S. J., Bralower T. J., Bown P. R., Zachos J. C. & Bybell L. M. Shelf and open-ocean calcareous phytoplankton assemblages across the Paleocene-Eocene Thermal Maximum: Implications for global productivity gradients. *Geology* **34**, 233-236 (2006).
5. Bralower T. J. et al. Evidence for Shelf Acidification during the Onset of the Paleocene–Eocene Thermal Maximum. *Paleoceanogr. Paleoclimatol.* **33**, 1408-1426 (2018).
6. Shaw A. B. *Time in stratigraphy*. McGraw-Hill (1964).
